# Supplementary material for: Two-dimensional Cs3Sb2I9/C2N van der Waals type-II heterostructure: a promising photocatalyst for high efficiency water splitting
Source: Royal Society of Chemistry journal article supplement (doi:10.1039/d2cp04665b), 2022-11-23
Supplement: d2cp04665b1.pdf [file d2cp04665b1.pdf]

## Supplementary Information

### **Two-dimensional Cs<sub>3</sub>Sb<sub>2</sub>I<sub>9</sub>/C<sub>2</sub>N van der Waals type-II heterostructure: A Promising Photocatalyst for high efficiency water-splitting**

Hui Wang,<sup>a</sup> Baozeng Zhou,\*<sup>a</sup>

*<sup>a</sup> Tianjin Key Laboratory of Film Electronic & Communicate Devices, School of Integrated Circuit  
Science and Engineering, Tianjin University of Technology, Tianjin 300384, China*

\*Corresponding Authors

[baozeng@tju.edu.cn](mailto:baozeng@tju.edu.cn) (B. Zhou)

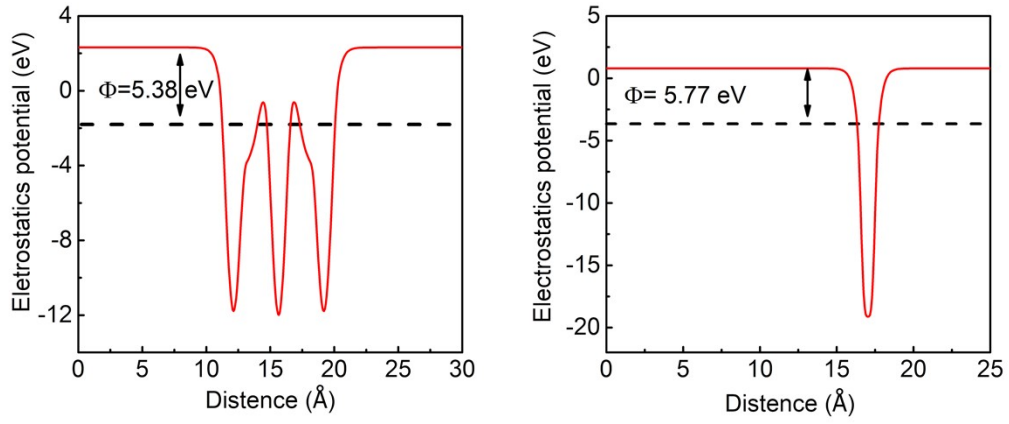

**Fig. S1.** (a) The plane-average electrostatic potential of (a) the Cs<sub>3</sub>Sb<sub>2</sub>I<sub>9</sub> monolayer and (b) C<sub>2</sub>N monolayer.

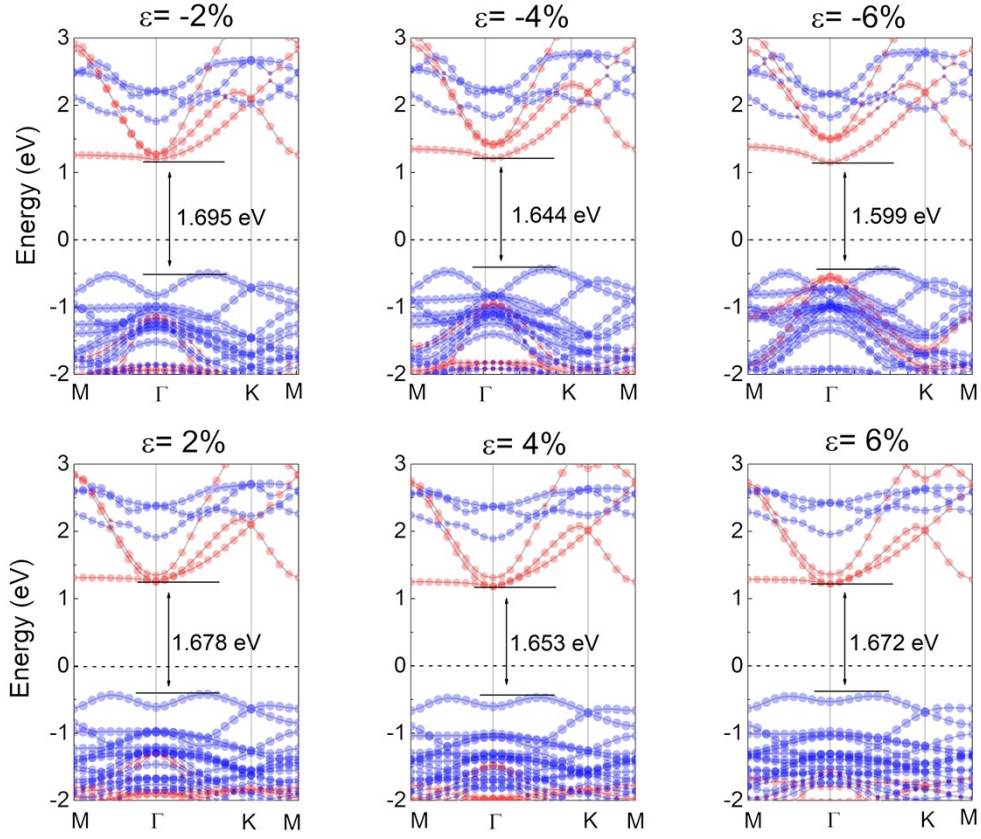

**Fig. S2.** The band structures of the  $\text{Cs}_3\text{Sb}_2\text{I}_9/\text{C}_2\text{N}$  heterostructure under different in-plane biaxial strains based on HSE06 method. The Fermi level is set to zero.

**Table S1.** The lattice vectors and fractional coordinates of each atom in Cs<sub>3</sub>Sb<sub>2</sub>I<sub>9</sub> monolayer.

|             |                     |                     |                     |
|-------------|---------------------|---------------------|---------------------|
| <b>a[Å]</b> | 8.5765446220052617  | -0.0002483203601371 | 0.0000000000000000  |
| <b>b[Å]</b> | -4.2884873627427877 | 7.4273813591313695  | 0.0000000000000000  |
| <b>c[Å]</b> | 0.0000000000000000  | 0.0000000000000000  | 32.1162986754999977 |
| <b>Cs</b>   | 0.0000002237613942  | -0.0000002237613942 | 0.4875089798720780  |
| <b>Cs</b>   | 0.6666679102651420  | 0.3333321277348610  | 0.3905298179730471  |
| <b>Cs</b>   | 0.3333319586159192  | 0.6666680163840821  | 0.5845802267985640  |
| <b>Sb</b>   | 0.6666626182419404  | 0.3333374197580630  | 0.5521316682149298  |
| <b>Sb</b>   | 0.3333370739032921  | 0.6666629010967093  | 0.4229951740651128  |
| <b>I</b>    | 0.5000007257513797  | 0.4999992662486263  | 0.4875472781026999  |
| <b>I</b>    | 0.5000010587203817  | 0.0000018559277786  | 0.4875474395715557  |
| <b>I</b>    | 0.0000018589277753  | 0.4999989362796215  | 0.4875474395715557  |
| <b>I</b>    | 0.1672293732362382  | 0.8327706017637556  | 0.3755004512061940  |
| <b>I</b>    | 0.1672354562808724  | 0.3344718348744096  | 0.3755026605971554  |
| <b>I</b>    | 0.6655281451255890  | 0.8327645207191219  | 0.3755026605971554  |
| <b>I</b>    | 0.3345019687295104  | 0.1672500300588584  | 0.5995945960560164  |
| <b>I</b>    | 0.8327499609411444  | 0.6654980282704923  | 0.5995945960560164  |
| <b>I</b>    | 0.8327553923549754  | 0.1672445926450276  | 0.5995968793179001  |

**Table S2.** The lattice vectors and fractional coordinates of each atom in C<sub>2</sub>N monolayer.

|             |                     |                     |                     |
|-------------|---------------------|---------------------|---------------------|
| <b>a[Å]</b> | 8.3287319581807910  | -0.0000086375643439 | 0.0000000000000000  |
| <b>b[Å]</b> | -4.1643734594268507 | 7.2128776652686950  | 0.0000000000000000  |
| <b>c[Å]</b> | 0.0000000000000000  | 0.0000000000000000  | 28.6035003661999987 |
| <b>C</b>    | 0.6649572866375831  | 0.1584761652715319  | 0.5955600433095020  |
| <b>C</b>    | 0.3349885443879356  | 0.8415201333268880  | 0.5956595566038005  |
| <b>C</b>    | 0.8414926157747485  | 0.5064955199102057  | 0.5955571754278379  |
| <b>C</b>    | 0.1584452948996779  | 0.4934817062717273  | 0.5956610035639622  |
| <b>C</b>    | 0.4934733252926527  | 0.3350109869042917  | 0.5955641888062967  |
| <b>C</b>    | 0.5064836582225742  | 0.6649773415631767  | 0.5956531663188126  |
| <b>C</b>    | 0.1584470410483025  | 0.6649779869047788  | 0.5956589147980300  |
| <b>C</b>    | 0.8414891099342869  | 0.3350094274929322  | 0.5955609477713283  |
| <b>C</b>    | 0.5064848012035074  | 0.8415210432113602  | 0.5956545249771583  |
| <b>C</b>    | 0.4934729002164080  | 0.1584767113576188  | 0.5955655530966505  |
| <b>C</b>    | 0.3349890260971121  | 0.4934829240720786  | 0.5956606190163212  |
| <b>C</b>    | 0.6649577975526456  | 0.5064937770785224  | 0.5955574130945321  |
| <b>N</b>    | 0.0000345343050144  | 0.6688782423430601  | 0.5955862260575377  |
| <b>N</b>    | 0.0000303720937557  | 0.3311047793888947  | 0.5955904449498829  |
| <b>N</b>    | 0.3310876579249200  | 0.3311005900158068  | 0.5955960398514453  |
| <b>N</b>    | 0.6688635075330792  | 0.6688793235882384  | 0.5955784847071436  |
| <b>N</b>    | 0.6688656689146286  | 0.0000004111987619  | 0.5955828544814462  |
| <b>N</b>    | 0.3310887337587158  | -0.0000013558998655 | 0.5955944541683168  |

**Table S3.** The lattice vectors and fractional coordinates of each atom in Cs<sub>3</sub>Sb<sub>2</sub>I<sub>9</sub>/C<sub>2</sub>N heterostructure.

|             |                     |                     |                     |
|-------------|---------------------|---------------------|---------------------|
| <b>a[Å]</b> | 8.3456922733198695  | -0.0000000000007894 | 0.0000000000000000  |
| <b>b[Å]</b> | -4.1728461366112484 | 7.2275815208635814  | 0.0000000000000000  |
| <b>c[Å]</b> | 0.0000000000000000  | 0.0000000000000000  | 35.1968994141000024 |
| <b>C</b>    | 0.6649359999399138  | 0.1585395468799504  | 0.6402403861571315  |
| <b>C</b>    | 0.8414605311200489  | 0.5063965070599608  | 0.6402403861571315  |
| <b>C</b>    | 0.4936034989400397  | 0.3350640050600902  | 0.6402403861571315  |
| <b>C</b>    | 0.8414605061200504  | 0.3350640050600902  | 0.6402403861571315  |
| <b>C</b>    | 0.4936034909400391  | 0.1585395468799504  | 0.6402403861571315  |
| <b>C</b>    | 0.6649360049399107  | 0.5063965070599608  | 0.6402403861571315  |
| <b>C</b>    | 0.3350396862159499  | 0.8415186379211264  | 0.6400909004273174  |
| <b>C</b>    | 0.1584813800788680  | 0.4935210612948140  | 0.6400909004273174  |
| <b>C</b>    | 0.5064789727051888  | 0.6649603207840471  | 0.6400909004273174  |
| <b>C</b>    | 0.1584813760788677  | 0.6649603207840471  | 0.6400909004273174  |
| <b>C</b>    | 0.5064789517051835  | 0.8415186379211264  | 0.6400909004273174  |
| <b>C</b>    | 0.3350397102159519  | 0.4935210612948140  | 0.6400909004273174  |
| <b>N</b>    | 0.9998523075193120  | 0.6683765496921765  | 0.6401666884638502  |
| <b>N</b>    | 0.3316234353078187  | 0.3314757498271277  | 0.6401666884638502  |
| <b>N</b>    | 0.6685242401728715  | 0.0001476944806882  | 0.6401666884638502  |
| <b>N</b>    | 0.3316234253078179  | 0.0001476944806882  | 0.6401666884638502  |
| <b>N</b>    | 0.6685242421728717  | 0.6683765496921765  | 0.6401666884638502  |
| <b>N</b>    | 0.9998523145193090  | 0.3314757498271277  | 0.6401666884638502  |
| <b>Cs</b>   | 0.0000000000000000  | 0.0000000000000000  | 0.4349319845023842  |
| <b>Cs</b>   | 0.6666666710000015  | 0.3333333420000031  | 0.3434549864300251  |
| <b>Cs</b>   | 0.3333333420000031  | 0.6666666839999991  | 0.5258608464019332  |
| <b>Sb</b>   | 0.6666666710000015  | 0.3333333420000031  | 0.4938071562099040  |
| <b>Sb</b>   | 0.3333333420000031  | 0.6666666839999991  | 0.3756653220506507  |
| <b>I</b>    | 0.4997778994005557  | 0.5002221205994388  | 0.4348345988707436  |
| <b>I</b>    | 0.4997778924005587  | 0.9995557848011174  | 0.4348345988707436  |
| <b>I</b>    | 0.0004442221988796  | 0.5002221205994388  | 0.4348345988707436  |
| <b>I</b>    | 0.1638879755788878  | 0.8361120214211155  | 0.3318777061109088  |
| <b>I</b>    | 0.1638879885788853  | 0.3277759771577777  | 0.3318777061109088  |
| <b>I</b>    | 0.6722240748422266  | 0.8361120214211155  | 0.3318777061109088  |
| <b>I</b>    | 0.3289453482912208  | 0.1644726761456070  | 0.5378518953901192  |
| <b>I</b>    | 0.8355272998543910  | 0.1644726761456070  | 0.5378518953901192  |
| <b>I</b>    | 0.8355272968543872  | 0.6710547067087802  | 0.5378518953901192  |
